# Supplementary material
Source: PubMed Central journal article supplement (PMC3046036)
Supplement: 97320630005326S1.pdf [file 97320630005326S1.pdf]

### Supplementary material:

**Table 1:** Templates selected for homology modeling of brinjal CC-NBS domains.

| Template | Phyre       | Modweb      | (PS) <sup>2</sup> | 3D Jury     | Swiss-Model | I-Tasser   |
|----------|-------------|-------------|-------------------|-------------|-------------|------------|
| 1        | 1Z6T-A (12) | 1Z6T-A (32) | 2A5Y-B (12)       | 2A5Y-B (11) | none        | 1Z6TA (15) |
| 2        | 2A5Y-B (14) | -           | 1Z6T-A (14)       | 2A5Y-B (10) | -           | 2A5YA (14) |
| 3        | 1QVR-B (12) | -           | 2A5Y-C (15)       | 2A5Y-B (1)  | -           | 2A5YB (14) |

Values in the parenthesis show percentage identity with the template in the aligned region.

**Table 2:** Ramachandran plot calculations of non proline non glycine residues on 3D model of CC-NBS.

|                                            | I-TASEER                            |      | HOMMER                             |      | SPDBV                               |      |
|--------------------------------------------|-------------------------------------|------|------------------------------------|------|-------------------------------------|------|
|                                            | Number                              | %    | Number                             | %    | Number                              | %    |
| Residue in most favoured regions           | 199                                 | 70.6 | 213                                | 85.2 | 233                                 | 82.6 |
| Residue in the additionally allowed zones  | 55                                  | 19.5 | 32                                 | 12.8 | 42                                  | 14.9 |
| Residue in the generously regions          | 14                                  | 5    | 4                                  | 1.6  | 5                                   | 1.8  |
| Residue in disallowed regions              | 14                                  | 5    | 1                                  | 0.4  | 2                                   | 0.7  |
| Total non-glycine and non-proline residues | 282                                 | 100  | 250                                | 100  | 282                                 | 100  |
|                                            | ER* 2, gly15, proline 2, total 301. |      | ER2, gly 13, proline 0, total 265. |      | ER 2, gly 15, proline 2, total 301. |      |

\*ER: end residues, gly: glycine
